# Supplementary material
Source: PubMed Central journal article supplement (PMC4004036)
Supplement: NIHMS546311-supplement-suppl.pdf [file NIHMS546311-supplement-suppl.pdf]

■ Letrozole ■ Letrozole + BMS-754807 ■ Tamoxifen ■ Tamoxifen + BMS-754807

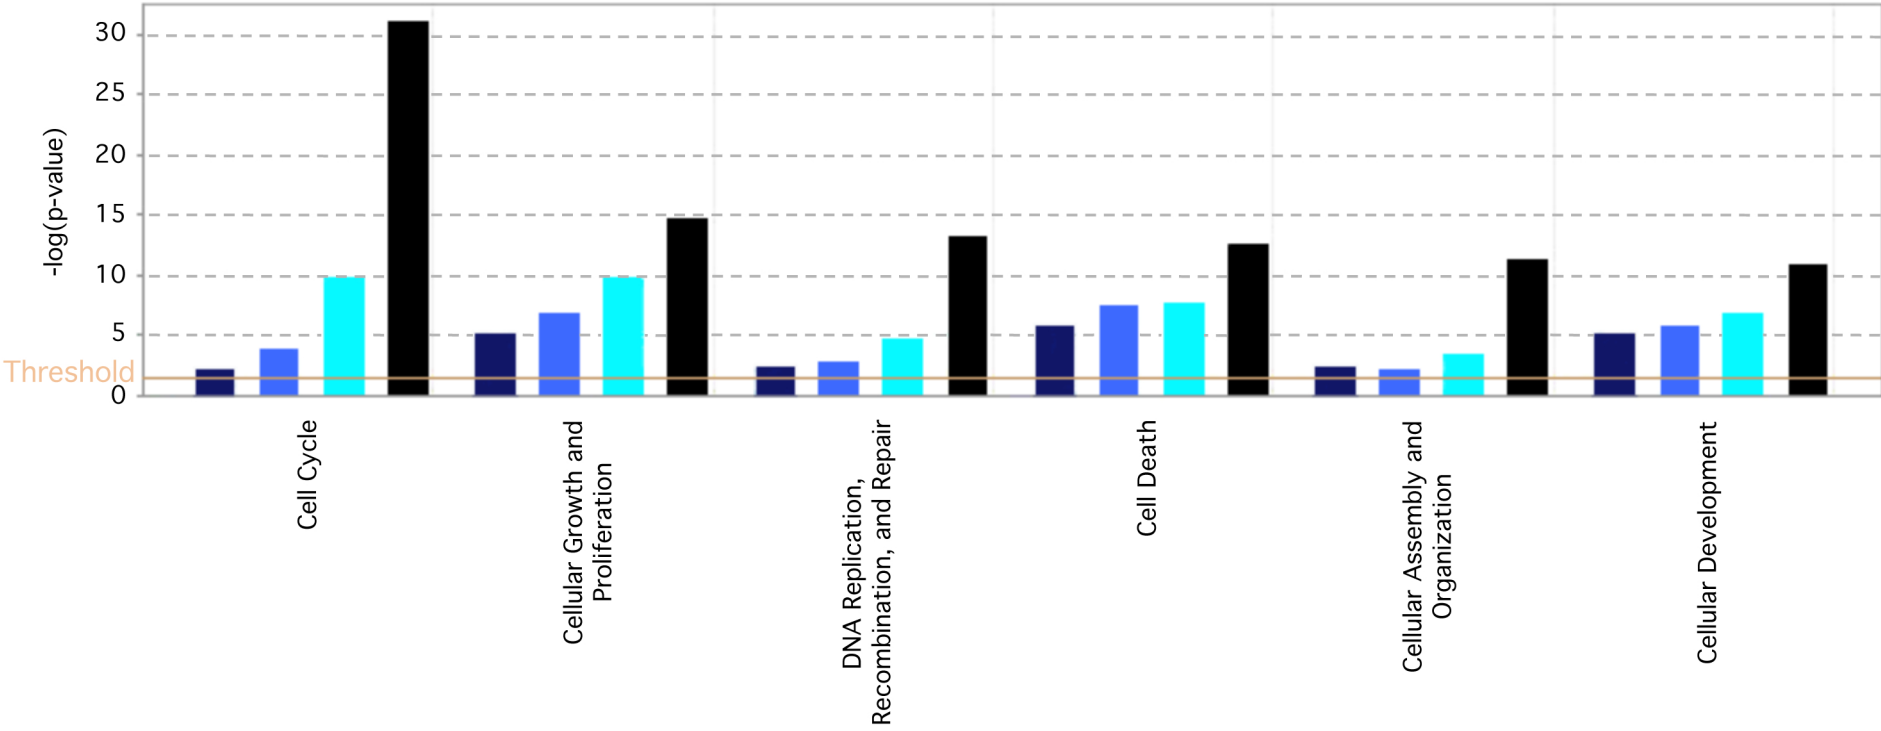

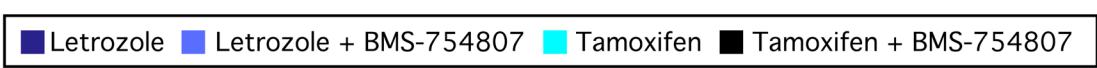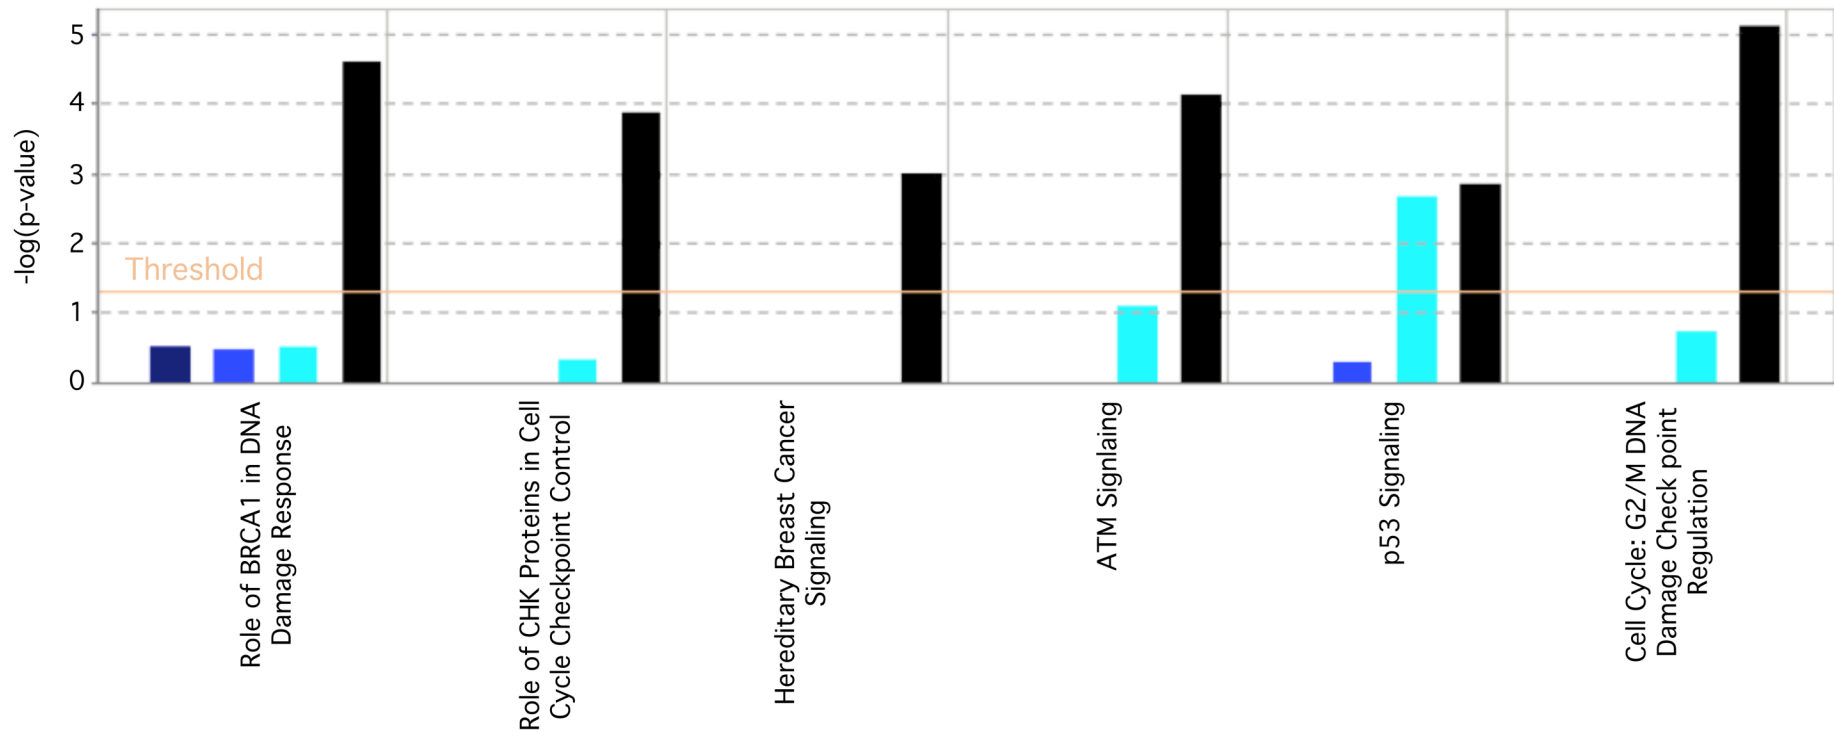

# Supplemental Figure 2, A

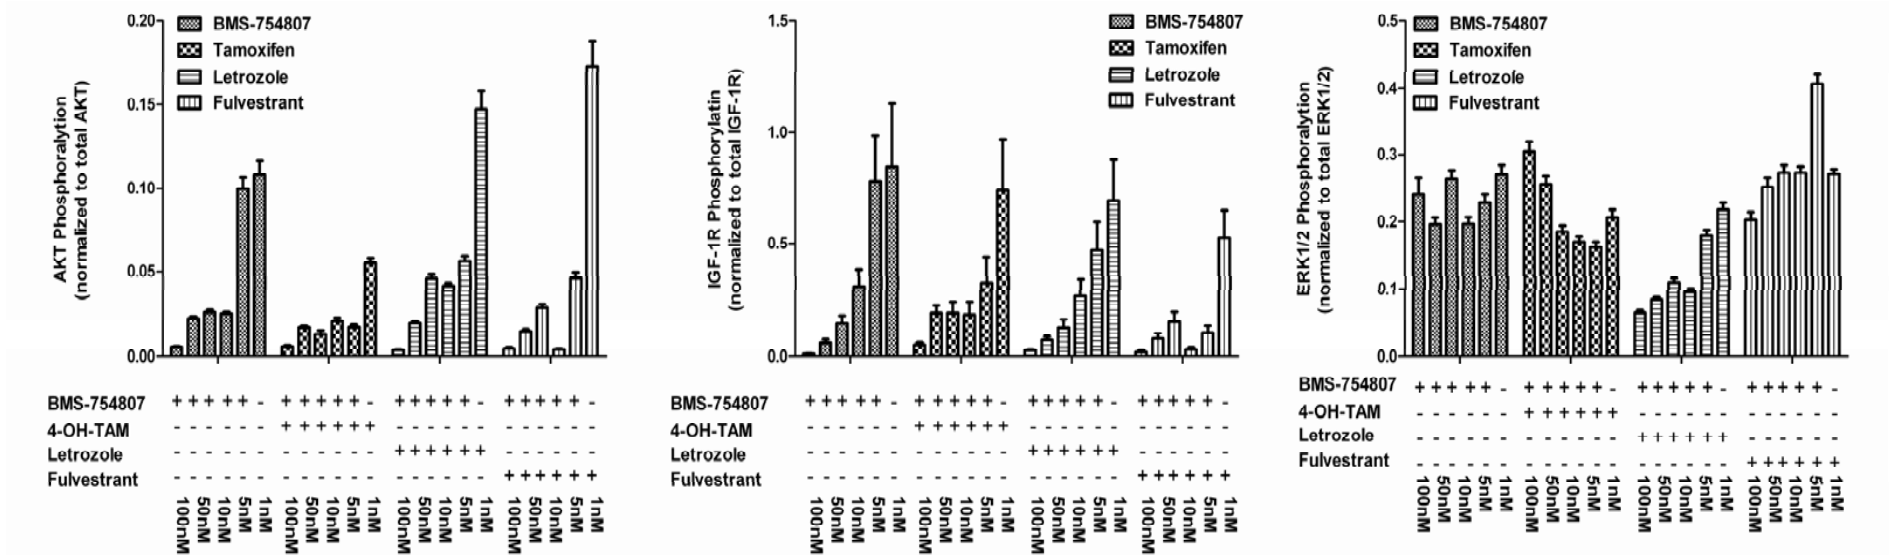

Supplemental Figure 2, B

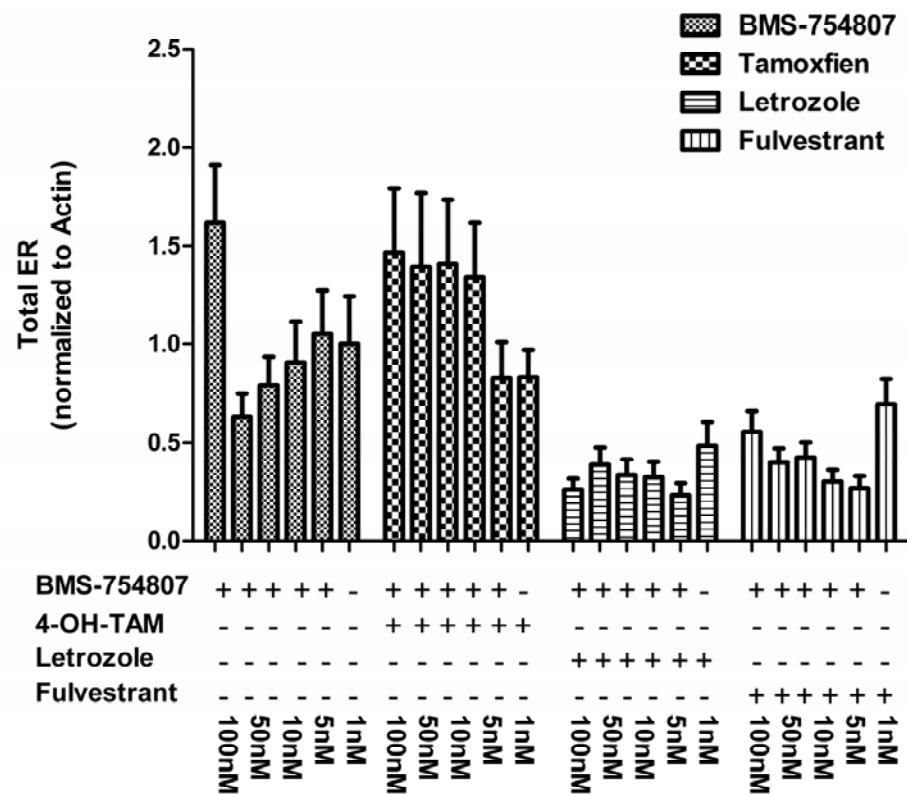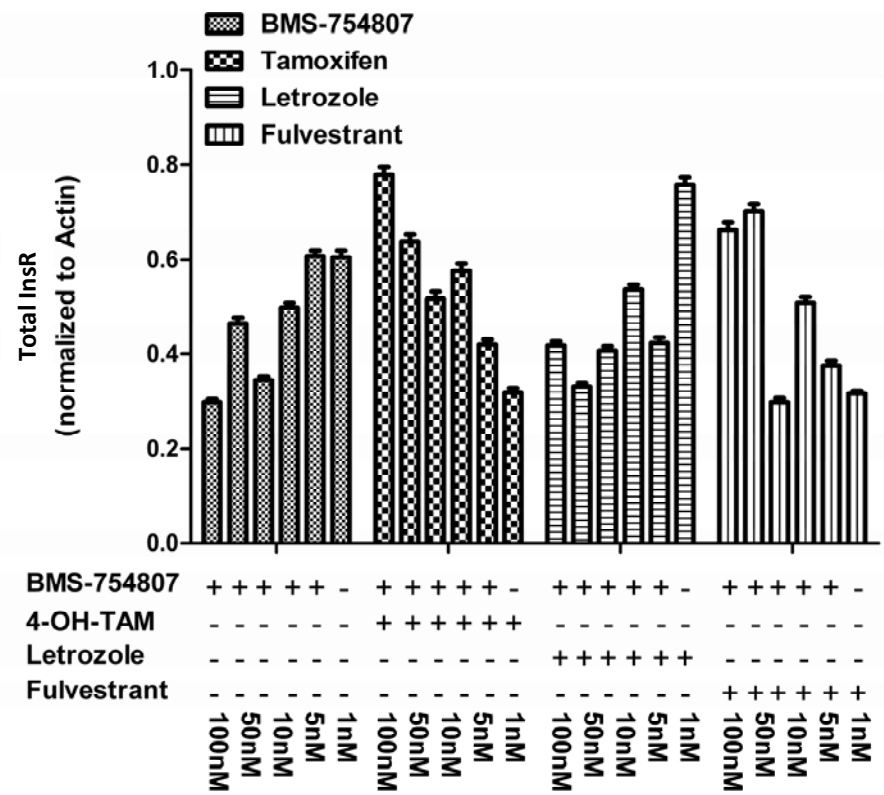

Supplemental Figure 3

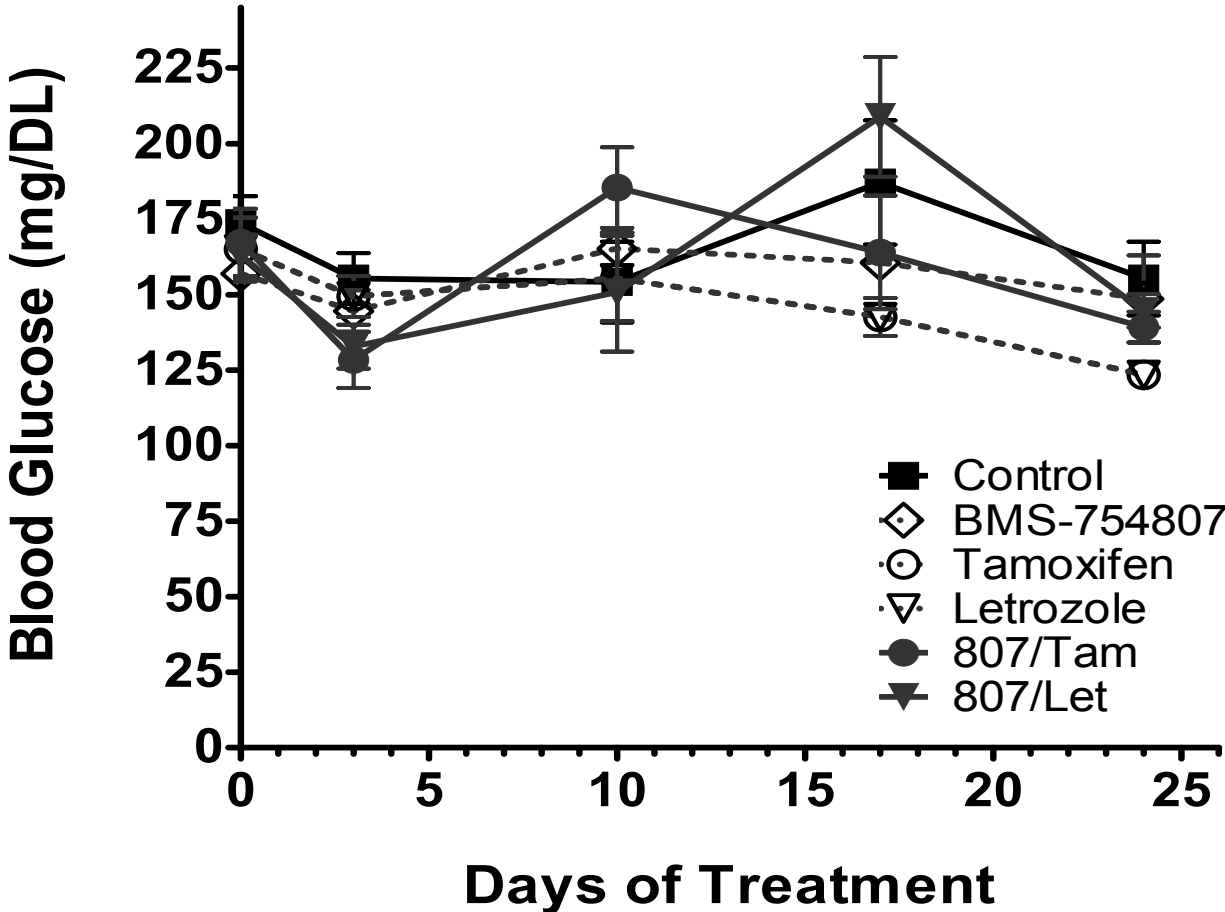

**Supplemental Table 1.** Genes that were significantly modulated by either tamoxifen, letrozole, BMS-754807 or tamoxifen/BMS-754807 or letrozole/ BMS-754807 with 5% of false discovery rate and 2-fold change when compared to the untreated control.

**Supplemental Figure 1.** Ingenuity Pathway Analysis to compare the top biological functions (A) and canonical pathways (B) differentially contributed by the genes that are modulated by each treatment condition.

**Supplemental Figure 2.** Densitometric analysis of western blot from indicated bands in Figure 4. A) Phospho-protein expression (P-IGF-1R, P-AKT at Serine 473, P-ERK) is calculated as a function of the respective total protein expression (IGF-1R, AKT, ERK1/2); B) Total ER and InsR are normalized to the housekeeping gene, actin.

**Supplemental Figure 3.** Reported absolute glucose readings in mg/DL during in vivo therapy.
